# Supplementary material for: A 4-connected 3D porous coordination polymer with a binodal 6284 net built on tetrahedral quadridentate and bidentate linkers
Source: Royal Society of Chemistry journal article supplement (doi:10.1039/b924237f), 2010-01-01
Supplement: b924237f.pdf [file b924237f.pdf]

# A 4-connected 3D porous coordination polymer with a binodal 6<sup>2</sup>8<sup>4</sup> net built on tetrahedral quadridentate and bidentate linkers

Shi-Bin Ren, Le Zhou, Jun Zhang, You-Long Zhu, Yi-Zhi Li, Hong-Bin Du\* and Xiao-Zeng You  
State Key Laboratory of Coordination Chemistry, Nanjing National Laboratory of  
Microstructures, School of Chemistry and Chemical Engineering, Nanjing University, Nanjing  
210093, China. E-mail: [hbdu@nju.edu.cn](mailto:hbdu@nju.edu.cn)

## Supporting Information

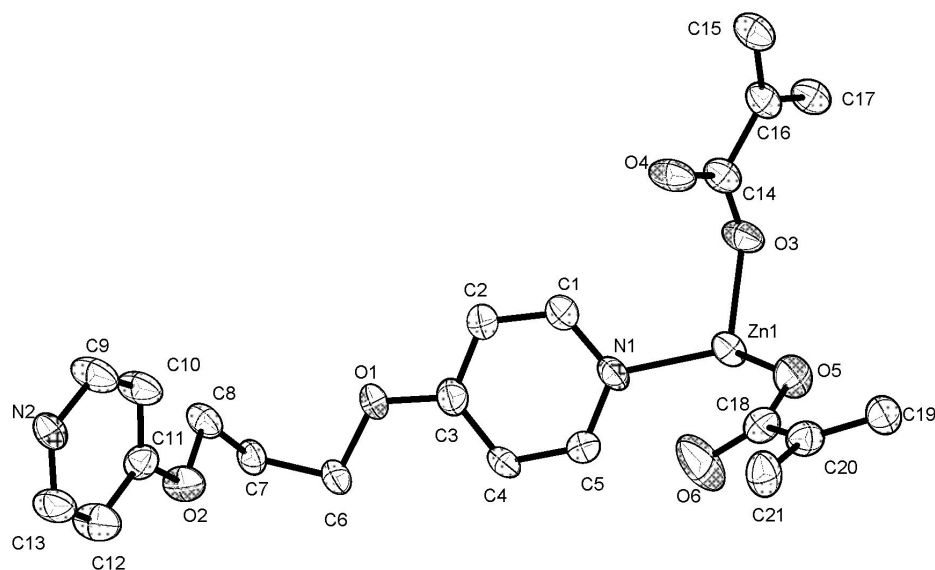

**Figure S1.** An ORTEP drawing of the asymmetric unit of complex **1** at the 50% probability (H atoms and water molecules are omitted for clarity).

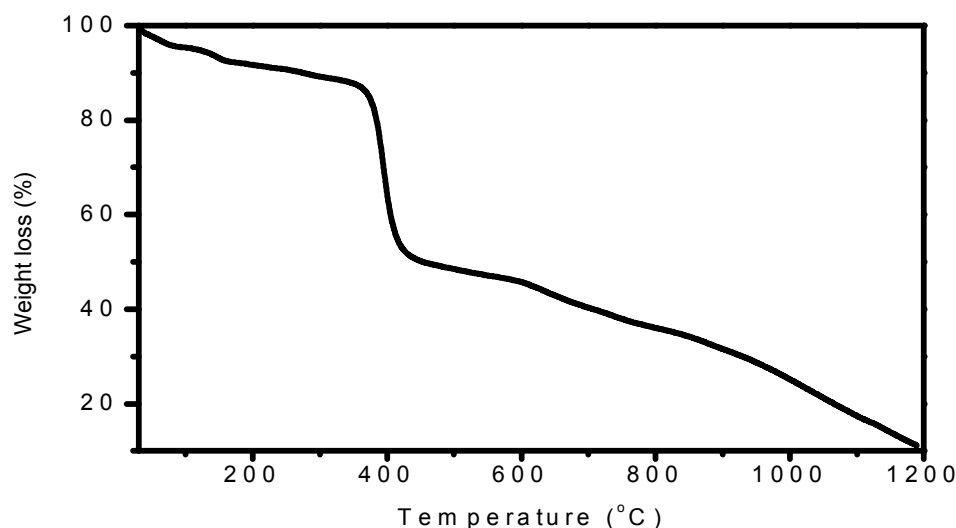

**Figure S2.** TGA curve of complex **1** under nitrogen.
